# Supplementary material
Source: publisher site journal article supplement (http://degruyter.com/publication/journal_key/NANOPH/downloadAsset/NANOPH_Instructions_for_Authors.pdf)
Supplement: Supplementary file 1 [file NANOPH_Instructions_for_Authors.pdf]

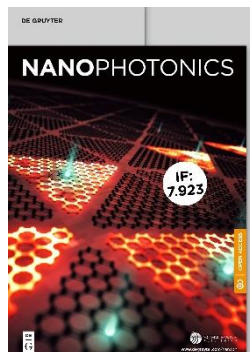

## Contents

[Submission Checklist](#)

[Journal Information](#)

[Article Templates](#)

[Peer Review Policy](#)

[Preparation of Manuscript](#)

[Language and Use of AI](#)

[Author Statements](#)

[Submitting your Manuscript](#)

[Post-Acceptance – Article Production Process](#)

[Post Publication Promotion](#)

[Open Access](#)

[Publication Costs](#)

[Support and Questions](#)

## SUBMISSION CHECKLIST

Before submitting your article to *Nanophotonics*, please follow the checklist below and ensure you are familiar with the journal's requirements and policies:

- Check if your article is suitable for *Nanophotonics* by reviewing the journal's [aims and scope](#) and [article categories](#).
- Familiarise yourself with the journal's [peer review policy](#).
- Understand the journal's [publishing process](#) and [publishing costs](#) (article processing charges).
- Ensure your manuscript is complete and all accompanying files meet the required specifications, as outlined in the [manuscript preparation guidelines](#).
- Manuscripts should be written in clear and concise English. Please have your text proofread by a native English speaker before you submit it for consideration.

[Back to Contents](#)

## JOURNAL INFORMATION

### Aims and Scope

*Nanophotonics* covers recent international research results, specific developments in the field and novel applications. The journal focuses on the interaction of photons with nanostructures, such as carbon nanotubes, nanometal particles, nanocrystals, semiconductor nanodots, photonic crystals, and tissue and DNA.

*Nanophotonics* disseminates the latest developments for physicists, engineers and material scientists working in fields related to:

- Plasmonics: metallic nanostructures and their optical properties
- Meta materials, fundamentals and applications
- Nanophotonic concepts and devices for solar energy harvesting and conversion
- Near-field optical microscopy
- Nanowaveguides and devices
- Nano lasers
- Nanostructures, nanoparticles, nanotubes, nanowires and nanofibers
- Photonic crystals
- Integrated silicon photonics
- Semiconductor quantum dots
- Quantum optics and quantum information
- Ultra-fast and non-linear pulse propagation in nanomaterials and structures
- Light-matter interaction and optical manipulation techniques

- Nano-biophotonics
- Optofluidics
- Optomechanics
- System applications based on nanophotonic devices
- Nanofabrication techniques, thin film processing and self-assembly

*Nanophotonics* is published in partnership with Sciencewise.

**Publication Frequency:** 24 issues per annum

**Publication Language:** English

**Publication Model:** Open access. All content published in the journal is published under a [CC BY 4.0](#) model. All articles accepted for publication will be required to pay an [article processing charge \(APC\)](#).

[Back to Contents](#)

#### Article Categories

| Article Type      | Word Count                 | Description/Specification                                                                                                                                                                                                                                                                                                                                                                                                                                                                                                                                                                                                                                                                                                                         |
|-------------------|----------------------------|---------------------------------------------------------------------------------------------------------------------------------------------------------------------------------------------------------------------------------------------------------------------------------------------------------------------------------------------------------------------------------------------------------------------------------------------------------------------------------------------------------------------------------------------------------------------------------------------------------------------------------------------------------------------------------------------------------------------------------------------------|
| Research Articles | Approximately 6,000 words  | <ul style="list-style-type: none"><li>• Include an abstract of approximately 250 words to provide a succinct summary reflecting the article's results and conclusions.</li><li>• Follow a standard structure that includes an Article Title, Author Names and Affiliations, Abstract, Keywords, Introduction, Materials and Methods, Results, Discussion, Acknowledgements and List of Non-Standard Abbreviations (if applicable), Author Statements, References, and Table and Figure Legends (if applicable).</li></ul>                                                                                                                                                                                                                         |
| Review Articles   | Approximately 16,000 words | <ul style="list-style-type: none"><li>• Review articles should be submitted only upon invitation of the Publishing Editor or the Editorial Board.</li><li>• Review articles should provide the reader with a balanced overview of the broad developments in the field and should not be dominated by the work of one single author or institution. The complexity of the writing should serve the wide audience of the journal, i.e., graduates to post-graduates from across disciplines.</li><li>• Mathematical formulas should be limited. Extensive images and graphs should be included to provide an understanding of the text to the wide audience the journal serves.</li><li>• Include an abstract of approximately 250 words.</li></ul> |

|              |                           |                                                                                                                                                                                                                                                                                                                                                                                                                                                                                                                                                                                                                                     |
|--------------|---------------------------|-------------------------------------------------------------------------------------------------------------------------------------------------------------------------------------------------------------------------------------------------------------------------------------------------------------------------------------------------------------------------------------------------------------------------------------------------------------------------------------------------------------------------------------------------------------------------------------------------------------------------------------|
|              |                           | <ul style="list-style-type: none"> <li>• The introduction should be short and focus primarily on recent developments, avoiding too much elaboration on historical developments.</li> <li>• The main body of text is to maintain a standard structure with the use of sections and subsections.</li> <li>• Include an Article Title, Author Names and Affiliations, Abstract, Keywords, Introduction, Discussion, Acknowledgements, List of Non-Standard Abbreviations (if applicable), Author Statements, References, and Table and Figure Legends (if applicable).</li> </ul>                                                      |
| Letters      | Approximately 2,500 words | <ul style="list-style-type: none"> <li>• Include a brief abstract of no more than 150 words.</li> <li>• Follow a standard structure that includes a Title, Author Names and Affiliations, Abstract, Keywords, Introduction, Materials and Methods, Results, Discussion, Acknowledgements and List of Non-Standard Abbreviations (if applicable), Author Statements, References, and Table and Figure Legends (if applicable).</li> </ul>                                                                                                                                                                                            |
| Perspectives | Approximately 8,000 words | <ul style="list-style-type: none"> <li>• Perspectives articles should summarise research findings in nanophotonics and place them in a broader context. This can include perspectives on a certain development in the field, the evolution and approaches to unanswered questions or cross-field border developments in general.</li> <li>• Perspective articles should include a Title, Author Names and Affiliations, Abstract, Keywords, Introduction, Discussion, Acknowledgements, List of Non-Standard Abbreviations (if applicable), Author Statements, References, and Table and Figure Legends (if applicable).</li> </ul> |

## ARTICLE TEMPLATES

To assist with the preparation of manuscripts, *Nanophotonics* provides article templates in both Word and LaTeX formats (links below). The use of them is not obligatory.

### LATEX

[https://www.degruyter.com/publication/journal\\_key/NANOPH/downloadAsset/NANOPH\\_LaTeX\\_Article\\_Template.zip](https://www.degruyter.com/publication/journal_key/NANOPH/downloadAsset/NANOPH_LaTeX_Article_Template.zip)

### WORD

[https://www.degruyter.com/publication/journal\\_key/NANOPH/downloadAsset/NANOPH\\_Word\\_Article\\_Template.dotm](https://www.degruyter.com/publication/journal_key/NANOPH/downloadAsset/NANOPH_Word_Article_Template.dotm)

[Back to Contents](#)

## PEER REVIEW POLICY

### Peer Review Information

*Nanophotonics* operates a **single-blind peer review** model with a two-phase refereeing system. All manuscripts are initially reviewed by the Managing Editor to assess the level of scientific writing, scientific innovation and integrity. The Managing Editors that support the review process are all active scientists with various backgrounds and expertise in the field of nanophotonics.

Our standard peer review policy requires each paper reporting primary research or secondary analysis of primary research, together with relevant supplementary materials, to be reviewed by at least two referees. Review articles are also reviewed by a minimum of two referees. The Editors reserve the right to decline the submitted manuscript without review if the studies reported are not sufficiently novel or important to merit publication in the journal. Manuscripts deemed unsuitable (insufficient originality or of limited interest to the target audience) are returned to the author(s) without review. The Editor seeks advice from experts in the appropriate field. The final decision of acceptance is made by the Managing Editor or, in case of conflict, by the Editor-in-Chief.

Authors are encouraged to suggest the names of relevant reviewers upon submission. Reviewers indicated by the authors must be from different institutions to the authors and should not have collaborated on the same research project within the past three years. Authors may also provide names of reviewers they wish to exclude from reviewing their manuscript. Please note that this will be treated only as a suggestion, and the final selection of reviewers is exclusively the Editor's decision.

### Peer Review Turnaround Times

- Average time from submission to initial editorial manager assessment: **5 days**
- Average time from submission to first decision: **22 days**
- Average time from submission to final decision: **57 days**
- Average time from acceptance to publication: **13 days**

### Issue-Based Publication

As soon as articles have undergone typesetting and are finalised, they are published online as DOI citable articles in the 'Just Accepted' section of the journal homepage. They are later assigned to an issue and published with page numbers.

### Appeals

Manuscripts that have been rejected for publication will be reconsidered only at the discretion of the Editor(s). Authors wishing to request reconsideration of a previously rejected manuscript must do so in written form and submit a rebuttal by email to the Publishing Editor, Dennis Couwenberg, at [dcouwenberg@nanophotonics-journal.com](mailto:dcouwenberg@nanophotonics-journal.com). Authors should provide detailed reasons as to why they believe the manuscript should be reconsidered. If the rebuttal is accepted, the author will be asked to resubmit the manuscript. The resubmitted manuscript will be given a new manuscript ID and submission date before undergoing peer review.

### Preprint Policy

*Nanophotonics* does not consider the following purposes of a paper as pre-publication: publication in the form of a congress abstract, publication as an academic thesis and publication as an electronic preprint in arXiv.

[Back to Contents](#)

## PREPARATION OF MANUSCRIPT

Please ensure that your manuscript adheres to the following guidelines. For specific requirements for different article types, please refer to the [article categories](#) guidelines above.

### Language and Use of AI

All manuscripts must be written in clear and concise English. Please use British or American English consistently. De Gruyter provides a light copyedit of accepted manuscripts, but authors remain responsible for their own copyediting. If you have reasons to doubt your proficiency concerning spelling or grammar (e.g., because English is not your native language), you may wish to employ – at your own expense – the services of a professional language editor.

Artificial Intelligence and Language Editing: In line with COPE's position on the use of artificial intelligence (AI) in published research, *Nanophotonics* and De Gruyter do not allow any AI tool to be listed as an author of a paper. However, authors who use AI tools to help write their paper, such as for language editing, must disclose this transparently in the Acknowledgements or Materials and Methods section, whichever is most relevant. Authors should state clearly which AI tool was used and for which specific purpose.

For more information, please see [COPE's full AI statement](#).

Language Editing Guidance: We recommend using a language editing service. There are several key considerations to ensure optimal results when using artificial intelligence tools for language editing in research papers. First, select a reliable and well-trained language model specializing in grammar, syntax, and style, such as ChatGPT. Second, provide clear instructions to the AI model, specifying the desired objectives, such as grammar correction, sentence structure improvements, or academic tone adjustments. Third, be mindful of the model's limitations and verify the accuracy of the suggestions it provides. While AI can be a helpful tool, it is crucial to exercise critical thinking and review any suggested changes to maintain the coherence and integrity of your research.

### Abstract

The abstract should be a concise summary of your article. It should be a single paragraph and approximately 250 words (150 words for Letters). As abstracts are published separately by abstracting and indexing services, please spell out abbreviations on first use and do not include footnotes, tables, figures or equations. Please avoid using references.

## Keywords

Keywords are used by abstracting and indexing services as well as search engines to facilitate finding your paper. Please supply three to six specific keywords. These can be single words or short phrases representing the content. Where possible, avoid the repetition of words already used in the article's title.

## Headings

Your manuscript should be subdivided into sections and, if necessary, subsections. These sections should be labelled with headings in a consistent format and with a clear hierarchy. Limit your subsections to a maximum of four levels. Please ensure that subdivided sections have at least two subheadings on one level. Headings should be numbered and in sentence case. Use lowercase letters after a colon. Headings do not have a full stop.

## References

References must be numbered consecutively in square brackets [] as they are cited. Multiple citations should be separated by commas [1], [2].

All references should be collected at the end of the paper. List all authors when there are six or fewer; when there are seven or more, list the first one, followed by "*et al.*" When citing internet addresses, it is important to include the access date as well as the URL.

Please use the following **IEEE style** for the reference list.

### Book:

*Basic format:*

J. K. Author, *Title of His Published Book*, xth ed., City of Publisher, (only US State), Country: Publisher, year.

*Example:*

L. Novotny and B. Hecht, *Principles of Nano-Optics*, 2 ed., Cambridge, England: Cambridge University Press, 2012.

### Book chapter:

*Basic format:*

J. K. Author, "Title of chapter in the book," in *Title of Published Book*, Book Editor, Ed., xth ed., City of Publisher, (only US State), Country: Publisher, year, pp. xxx-xxx.

*Example:*

R. K. Andrews, M. C. Berndt, and J. A. López, "The glycoprotein Ib-IX-V complex," in *Platelets*, A. Michelson, Ed., 2nd ed., San Diego, CA, USA: Academic Press, 2006, pp. 145-163.

### Journal article:

*Basic format:*

J. K. Author, "Title of paper," *Abbrev. Title of Periodical*, vol. x, no. x, pp. xxx-xxx, year, doi.

*Example:*

A. Schirato, M. Maiuri, G. Cerullo, and G. Della Valle, "Ultrafast hot electron dynamics in plasmonic nanostructures: experiments, modelling, design," *Nanophotonics*, vol. 12, no. 1, pp. 1-28, 2023, <https://doi.org/10.1515/nanoph-2022-0592>.

**Journal article in another language:***Basic format:*

J. K. Author, "Title of paper," (in Language), *Abbrev. Title of Periodical*, vol. x, no. x, pp. xxx-xxx, year.

*Example:*

E. P. Wigner, "On a modification of the Rayleigh-Schrodinger perturbation theory," (in German), *Math. Naturwiss. Anz. Ungar. Akad. Wiss.*, vol. 53, no. 1, p. 475, 1935.

**Epub ahead of print (DOI):***Basic format:*

J. K. Author, "Title of paper," *Abbrev. Title of Periodical*, year, doi.

*Example:*

R. Ota and S. Uenoyama, "Plasmonic ultraviolet filter for fast-timing applications," *Nanophotonics*, 2023, <https://doi.org/10.1515/nanoph-2022-0704>.

**In press/forthcoming journal article:***Basic format:*

J. K. Author, "Title of paper," *Abbrev. Title of Periodical*, to be published.

*Example:*

T. Ferreira de Lima, *et al.*, "Design automation of photonic resonator weights," *Nanophotonics*, to be published.

**Preprint:***Basic format:*

J. K. Author, "Title of paper," unpublished.

J. K. Author, "Title of paper," year, doi.

*Example:*

T. Dubček, *et al.*, "Binary classification of spoken words with passive elastic metastructures," 2021, arXiv:2111.08503.

**Conference proceedings:***Basic format:*

J. K. Author, "Title of paper," Abbreviated Name of Conf., (location optional), year, doi.

*Example:*

O. Fesenko and L. Yatsenko, "Nanophotonics, nanooptics, nanobiotechnology and their applications," *Proc. 6th Int. Conf. Nanotechnol*, 2019, <https://doi.org/10.1007/978-3-030-17755-3>.

**Conference paper:***Basic format:*

J. K. Author, "Title of paper," presented at the Abbreviated Name of Conf., City of Conf., Abbrev. State, Country, Month and day(s), year, paper number.

J. K. Author, "Title of paper," Abbreviated Name of Conf., City, State, Country, year, pp. xxx-xxx.

J. K. Author, "Title of paper," Abbreviated Name of Conf., Volume Title, in Series Title, ed., year, pp. xxx-xxx.

*Example:*

A. Pozio and S. Galli, "The role of hydrogen from electrolysis in the overproduction of energy from renewable sources," 2022 IOP Conf. Ser.: Mater. Sci. Eng., vol. 1265, 2022.



**Website:***Basic format:*

J. K. Author, "Page title," Website Title. Accessed: Date Accessed. [Online]. Available: Web Address

*Example:*

P. Bhandari, "Nominal data | Definition, examples, data collection & analysis," Scribbr. Accessed: Aug. 11, 2022. [Online]. Available: <https://www.scribbr.com/statistics/nominal-data/>

**Patent:***Basic format:*

J. K. Author, "Title of patent," Country Patent xxx, Month, day, year.

*Example:*

J. P. Wilkinson, "Nonlinear resonant circuit devices," U.S. Patent 3 624 125, Jul. 16, 1990.

**Standards:***Basic format:*

*Title of Standard*, standard number, month, year.

*Example:*

*Frequency Response and Bias*, NERC Reliability Standard BAL-003-0.1b, May, 2009.

**M. Theses (B.S., M.S.) and Dissertations (Ph.D.):***Basic format:*

J. K. Author, "Title of thesis," M.S. thesis, Abbrev. Dept., Abbrev. Univ., City of Univ., Country, year.

J. K. Author, "Title of dissertation," Ph.D. dissertation, Abbrev. Dept., Abbrev. Univ., City of Univ., Country, year.

*Example:*

N. Kawasaki, "Parametric study of thermal and chemical nonequilibrium nozzle flow," M.S. thesis, Dept. Electron. Eng., Osaka Univ., Osaka, Japan, 1993.

**Report:***Basic format:*

J. K. Author, "Title of report," Abbrev. Name of Company, City of Company, Country, Rep. xxx, (optional: vol./issue), month, year.

*Example:*

E. E. Reber, R. L. Michell, and C. J. Carter, "Oxygen absorption in the earth's atmosphere," Aerospace Corp., Los Angeles, CA, USA, Tech. Rep. TR-0200 (4230-46)-3, Nov., 1988.

**Report online:***Basic format:*

J. K. Author, "Title of report," year. [Online]. Available: site/path/file

*Example:*

S. Urazhdin, N. O. Birge, W. P. Pratt Jr., and J. Bass, "Current-driven magnetic excitations in permalloy-based multilayer nanopillars," 2003. [Online]. Available: arXiv:cond-mat/0303149

## Figures and Figure Captions

Graphs, line drawings, photographs, schemes and diagrams may be used to illustrate your findings. The publication quality always depends directly on the quality and size of the delivered data.

All illustrations must be of reproduction-ready quality. They will be reduced in size to fit, whenever possible, the width of a single column.

The lettering of all figures within the article should be uniform in style (preferably a sans serif typeface such as Helvetica) and of sufficient size (approximately 8pt). Uppercase letters A, B, C, etc. should be used to identify multi-part figures. Cite all figures in the text in alphabetical or numerical order.

For an initial submission, authors are strongly advised to upload their entire manuscript, including tables and figures, as a single PDF file. Source files should include DOC/DOCX or TEX (in a ZIP archive) files in which the approximate placement of each figure should be indicated. Preferably, figures should be submitted in separate files; do not embed figures within the text body of the manuscript.

Figures (greyscale and colour) should have a minimum resolution of 600DPI and be of good contrast. Authors are encouraged to submit illustrations in colour if necessary for their scientific content.

Line drawings must be of reproduction-ready quality. Please note that faint shading may be lost upon reproduction. When drawing bar graphs, use patterning instead of grey scales. Lettering of all figures should be uniform in style. A resolution of 1,200DPI is recommended.

Figure legends: Provide a short descriptive title and a legend to make each figure self-explanatory. Explain all symbols used in the figures. Remember to use the same abbreviations as in the text body.

**Permissions for the reuse of figures:** It is the responsibility of the author(s) to obtain permission to reproduce original or modified material that has been previously published and to ensure that images do not infringe on any copyrights, performing rights, trademark rights, personal rights or any other third-party rights or are otherwise unlawful. Copyright permissions can be obtained through the Copyright Clearance Center. If you want to use material published by De Gruyter, please check the instructions on our website: <https://www.degruyter.com/page/rights-permissions>. If you are requesting rights for figures published by other publishers, you need to check the publisher's website for standard terms and conditions.

## Tables and Table Captions

Number tables consecutively using Arabic numerals.

Provide a short descriptive title, column heads and (if necessary) footnotes to make each table self-explanatory. In column heads, separate units with a comma and use parentheses or square brackets for additional measures (e.g., %, range, etc.). Use footnotes in alphabetical order (a, b, c, etc.) to give emphasis or further information. Expand abbreviations used in tables in footnotes. If bold type or italics are used to highlight information, please explain their meaning.

Avoid colour, shading, vertical lines and other cell borders. Note that most horizontal lines within the table body will be removed during the production process.

Refer to tables in the text as Table 1, etc. Use Table 1, etc. in the table legends. In the text, please avoid expressions such as “in Table 1 below/above”, as the exact positioning of these elements cannot be determined until after the manuscript has been typeset. Note that tables will usually be placed on the top or the bottom of the page in the final layout.

### **Abbreviations**

The use of abbreviations and acronyms is permitted as long as they are expanded in full when used the first time with the abbreviation in parentheses (applies to abstract and main text). Please use them consistently thereafter. Avoid using non-standard abbreviations unless they appear more than three times in the text. We recommend providing a list with an overview of all abbreviations. The list of abbreviations is placed at the end of the main text before the reference list in the typeset manuscript.

### **Equations and Symbols**

Equations should be well-aligned and not crowded. Use only Latin and Greek alphabets. Avoid complicated superscripts and subscripts by introducing new symbols. Avoid repetition of a complicated expression by representing it with a symbol. For MS Word submissions, create equations using the Microsoft equation editor or a corresponding add-on. Do not submit math equations as images but as editable text. Number displayed equations consecutively with Arabic numerals (if referred to in the text).

### **Units**

Use SI units. For more information, please visit <https://www.bipm.org/en/home>.

### **Appendices**

Use appendices for information that supports your findings but is not essential for the understanding of your paper (e.g., lengthy mathematical proofs, questionnaires, graphics, correspondence with other researchers). Cite appendices within the main text. Tables and figures in the appendix should be numbered consecutively as follows: Figure A.1, Table A.1, Figure A.2, Table A.2, etc. The appendix is placed at the end of the main text before the reference list.

### **Supplementary Material**

Authors are encouraged to submit supplementary materials in addition to the manuscript files. The data/information will be available online on the journal's website. Supplementary material may contain extensive tables, additional figures, questionnaires for discussed surveys, protocols, code samples, datasets and multimedia files (audio, video, animations). Material that has been published previously should not be included as supplementary files.

Please provide supplementary material data as a separate file(s) of no more than 10MB during submission. Note that the material should be publication-ready (not in track changes mode), as it will not be typeset but published exactly as supplied. Within the text, the supplementary material must be cited consecutively and be referred to as supplementary material data (e.g., see Supplementary Material, Fig. 1). Authors are strongly advised to submit supplementary materials prepared using the journal's Word or LaTeX template.

If the software required for users to view/use the supplementary material is not embedded in the file, you are urged to use shareware or generally available/easily accessible programs.

### Author Statements

Manuscripts must follow certain ethical guidelines to be considered for publication. These can be found in De Gruyter's [Publication Ethics Statement](#). Before submitting your manuscript, please make sure you and your co-authors agree to the applicable requirements. Furthermore, our [Code of Conduct for Publication Procedures and Ethics](#) defines the responsibility of De Gruyter as a publisher and the Editors we work with to ensure the legitimacy and quality of our published research. Our principles are based on the guidelines of the [Committee on Publication Ethics \(COPE\)](#).

Please ensure the following statements relating to publication ethics are included in your submission. These should appear at the end of your article, before your references. During the submission of an article, authors will also be asked to provide author statements in a separate document. Please refer to the [author statements template](#).

- Acknowledgements (*if applicable*)
- Research Funding Statement (*mandatory*)
- Author Contribution Statement (*mandatory*)
- Conflict of Interest Statement (*mandatory*)
- Informed Consent Statement (*if applicable*)
- Ethical Approval Statement (following specific guidelines for any research involving humans or animals) (*if applicable*)

### Please refer to the following guidance when preparing your statements.

Acknowledgements (*if applicable*): Authors may wish to acknowledge individuals, working groups or institutions that provided help and support (other than financial assistance) during research and the preparation of the manuscript (e.g., language checking, writing assistance or proofreading of the article). Do not include acknowledged individuals on the title page, as a footnote to the title or otherwise.

Research Funding Statement (*mandatory*): If your study benefitted from funding through an unrestricted grant or other resources provided to a university, college, other research institution or an individual author, state the name of the institute or organisation that provided the funding along with the grant number, if applicable. If no funding has been provided for the research, please use the default statement: '*None declared.*'

Author Contribution Statement (*mandatory*): Authors must declare their responsibility for the entire content of the manuscript and may indicate the individual contributions of each author, if applicable. Please include the following declaration in your author contribution statement: '*All authors have accepted responsibility for the entire content of this manuscript and approved its submission.*' For single-authored articles, please include the statement: '*Single author contribution.*'

Authorship should be limited to those who have made a significant contribution to the conception, design, execution, or interpretation of the reported study. All those who have made significant contributions should be listed as co-authors. Where there are others who have participated in certain substantive aspects of the research project, they should be named in the Acknowledgement section. The corresponding author should ensure that all appropriate co-authors (according to the above definition) and no inappropriate co-authors are included in the author list of the manuscript and that all co-authors have seen and approved the final version of the paper and have agreed to its submission for publication.

Conflict of Interest Statement (*mandatory*): A conflict of interest for a particular manuscript exists when a participant in the peer review and publication process – author, reviewer or editor – has ties to activities that could inappropriately influence his or her judgement, regardless of whether the judgement is actually affected. Financial relationships with industry (e.g., employment, consultancies, stock ownership, honoraria, patent applications, expert testimony, grants and other funding), either directly or through immediate family, are usually considered the most important conflicts of interest. However, conflicts can occur for other reasons, such as financial support of the study, ties to health insurance, politics or other stakeholders, personal relationships, academic competition and intellectual passion. To ensure fair and objective decision-making, authors must declare any financial, personal or professional associations that pose a conflict of interest in connection with the manuscript under evaluation. This must be declared during the submission process and at the end of the manuscript. If you do not have a statement to make, please use the default statement: *‘Authors state no conflict of interest.’* Authors are encouraged to fill in the ICMJE Conflicts of Interest Form ([available here](#)) and upload the completed form during the submission process.

Informed Consent Statement (*if applicable*): Protection of privacy is a legal right that must not be infringed upon without individual informed consent. In cases where the identification of personal information is necessary for scientific reasons, authors should obtain full documentation of informed consent, including written permission from the patient or their legal guardians before inclusion in the study. The following (or similar) statement should appear in your informed consent statement: *‘Informed consent was obtained from all individuals included in this study.’*

Ethical Approval Statement (*if applicable*):

**Authorisation for the use of human subjects:** Manuscripts that contain information on the use of humans should clearly state that the research complies with all relevant national regulations and institutional policies and has been approved by the author’s Institutional Review Board or any equivalent Committee. The Editors reserve the right to seek additional information or guidance from reviewers on any cases in which concerns arise. All investigations with human subjects must have been conducted by following the tenets of the Declaration of Helsinki. Moreover, authors must identify the Committee or Institutional Review Board approving the experiments and provide a statement indicating approval of the research. The following (or similar) statement should be included in your Ethical Approval statement: *‘The research related to human use complies with all relevant national regulations and institutional policies and in accordance with the tenets of the Helsinki Declaration, and has been approved by the authors’ Institutional Review Board or equivalent Committee.’* Detailed information should be provided (IRB name, IRB approval date and ID).

**Authorisation for the use of experimental animals and wildlife in natural settings:** Manuscripts that contain information on the use of animals should clearly state that the research has complied with all relevant national regulations and institutional policies and has been approved by the authors' Institutional Review Board or any equivalent Committee. The Editors reserve the right to seek additional information or guidance from reviewers on any cases in which concerns arise. The research using animal subjects should be conducted according to the principles of laboratory animal care (e.g., [NIH](#)). For manuscripts reporting experiments on live vertebrates or higher invertebrates, authors must identify the Committee approving the experiments and must confirm that all experiments were performed in accordance with relevant regulations. The following (or similar) statement should appear in your Ethics Approval Statement: *'The research related to animal use has complied with all the relevant national regulations and institutional policies for the care and use of animals.'* Detailed information should be provided (IRB name, IRB approval date and ID). For research involving wildlife in natural settings, authors must have obtained Institutional Animal Care approval and state that they have complied with the relevant national, international and institutional guidelines regarding the ethical treatment of the taxa of study and cite them.

[Back to Contents](#)

## DATA AVAILABILITY

*Nanophotonics* requires authors to follow our [Data Sharing Policy](#), which must comply with the European General Data Protection Regulation (GDPR) rules. Research data should be made widely available to the research community to demonstrate the robustness and validity of the research presented in the journal, enable and encourage replication of the results and provide the community with opportunities to learn.

Publishing in the journal requires authors to provide a data availability statement (DAS) in their article. The DAS confirms the presence or absence of shared data. The DAS should include information on where the data supporting the findings reported in the article can be found, including, if applicable, hyperlinks to publicly archived datasets analysed or generated during the study. If research data are not publicly available, this must be stated in the manuscript, as well as the conditions for accessing the data.

Authors are encouraged to share their data but are not required to do so. The decision to publish will not be affected by whether or not authors share their research data.

The DAS should be included before the references (at the end of the Author Statements) and can take one of the following forms (or a combination of more than one if required for multiple types of research data):

- *The datasets generated and/or analysed during the current study are available in the [NAME] repository at [PERSISTENT WEB LINK TO DATASETS].*
- *The datasets generated and/or analysed during the current study are available from the corresponding author upon reasonable request.*

- *Data sharing does not apply to this article as no datasets were generated or analysed during the current study.*
- *All data generated or analysed during this study are included in this published article [and its supplementary information files].*

*The data that support the findings of this study are available from [third party name] but restrictions apply to the availability of these data, which were used under license for the current study, and so are not publicly available. However, data are available from the authors upon reasonable request and with permission of [third party name].*

[Back to Contents](#)

## SUBMITTING YOUR MANUSCRIPT

All manuscripts should be submitted exclusively online via the *Nanophotonics* ScholarOne website: <https://mc.manuscriptcentral.com/nanoph>.

During the submission of an article, authors will be asked to provide their entire manuscript in the PDF format. Additionally, as the “Source Code of Main Document” users of Word are asked to upload a DOC/DOCX file (containing all tables and figures), whereas LaTeX users must upload ALL source codes in a ZIP archive (incl. TEX, CLS, STY).

If you require any support with submitting your manuscript to ScholarOne, please contact the Editorial Office at [nanophotonics.editorial@degruyter.com](mailto:nanophotonics.editorial@degruyter.com).

### Submission Declaration and Verification

Submission of a manuscript to *Nanophotonics* implies that the work described has not been published previously except in the form of an abstract, academic thesis, lecture or preprint; that it is not under consideration for publication elsewhere (multiple, redundant or concurrent publication); and that publication of the work is approved by all authors and tacitly or explicitly by the responsible authorities where the work was carried out. For information on publication ethics, please refer to [COPE](#).

To exclude potential overlap with prior publication(s), your manuscript may be checked by the originality checking tool, [iThenticate](#). Any previously published material must be referenced appropriately in the manuscript, regardless of whether the material was previously published in a subscription-based, hybrid or open access journal.

### Scientific Misconduct

*Nanophotonics* publishes only original manuscripts that are not already published or are going to be published elsewhere. Multiple submissions/publications, or redundant publications (re-packaging in different words of data already published by the same authors) will be rejected. If they are detected only after publication, the journal reserves the right to publish a Retraction Note. Editors will follow [COPE's Core Practices](#) and implement the advice for each particular case.



## ORCID

ORCID (Open Researcher and Contributor ID) is a non-profit, publisher-independent system that is used to uniquely identify academics and their publications. [Click here](#) for detailed information about ORCID.

Submitting authors can log in with their username and password. However, since the journal uses ScholarOne as a submission tool, authors can also log in with their ORCID details. Therefore, providing ORCID details for each author is strongly recommended. Furthermore, all authors are requested to register with institutional email addresses and refrain from using private email addresses.

[Back to Contents](#)

## POST-ACCEPTANCE – ARTICLE PRODUCTION PROCESS

The following section provides information on the production process once an article has been accepted for publication in the journal.

### Galley Proofs

Online proofreading: The corresponding author of an article receives the galley proofs electronically to check them for editing and typesetting accuracy. Corresponding authors receive an email notification ('Check your proof') with a link to the online proofreading system (Proof Central) where they can access their galley proofs. The interface is similar to MS Word; authors can edit the text by entering their corrections directly, adding comments and answering questions from the copy editor. If preferred, authors can also annotate and upload edits to the PDF version.

All instructions for proof corrections, including deadlines, will be given in the email notification to the corresponding author, along with a user guide providing step-by-step instructions for inserting corrections.

### Publication

*Nanophotonics* endeavours to publish articles as soon after acceptance as possible. The average time from acceptance to publication is 13 days.

As soon as articles have been typeset and finalised, they are first published online as DOI citable articles in the '[Just Accepted](#)' section of the journal homepage.

They are later assigned to an issue and published in the issue with page numbers.

[Back to Contents](#)



## POST PUBLICATION PROMOTION

Once your paper has been published, we encourage you to share your work as widely as possible to ensure it is widely read, cited, and used.

We also offer all *Nanophotonics* authors the opportunity to promote their research across our social media channels, such as [Twitter](#) (@Nanophotonics\_J) and [WeChat](#) (ID: Nanophotonics2012), where you will benefit from exposure to our large following. When your work is published, you will be invited to send us a summary that will be used in the promotion of your article.

Just been published? Check out ways to share your research with our [post-publication guide](#).

[Back to Contents](#)

## OPEN ACCESS

*Nanophotonics* is a fully open access journal. All articles published in the journal are published under a [Creative-Commons Attribution Only license](#) (CC-BY 4.0).

All authors retain copyright unless, due to their local circumstances, their work is not copyrighted. The copyrights are governed by the [Creative-Commons Attribution Only license](#) (CC-BY), which is compliant with Plan-S. The corresponding author grants the journal license for use of the article, by signing the License to Publish.

### License to Publish Agreement

During the submission of an article, authors will be asked to sign a copy of the [License to Publish Agreement](#) and upload to ScholarOne.

[Back to Contents](#)

## PUBLICATION COSTS

### Article Processing Charges (APCs)

To sustain the production of our fully refereed open access journal, each article accepted for publication in *Nanophotonics* is subject to an article processing charge of €2,500. This fee is used to cover the costs of the peer review process, professional typesetting and copyediting, as well as online hosting, long-term preservation and extensive promotion to potential readers. Information regarding payment of these charges will be provided following acceptance for publication. Enquiries concerning article processing charges should be addressed to the Publishing Editor (see contact details below).

### Waiver Policy

If the submitting author is affiliated with an organisation that has an [open access agreement](#) with De Gruyter, APCs may be covered or discounted.

In addition, *Nanophotonics* and De Gruyter are committed to supporting researchers in emerging nations to share their research with a global audience. APCs may be waived for authors who work for institutions in developing countries (countries [classified by the World Bank](#) as low-income and lower-middle-income economies).

Moreover, all authors can apply for a discount or waiver during the submission process. Authors are asked to contact the Managing Editor before, or straight after, submitting their article.

[Back to Contents](#)

## SUPPORT AND QUESTIONS

Thank you for your interest in submitting your article to *Nanophotonics*!

If you have any questions or need any further help, please use the contact details below.

Publishing Editor

**Drs. Ing Dennis Couwenberg**

Email: [dcouwenberg@nanophotonics-journal.com](mailto:dcouwenberg@nanophotonics-journal.com)

WeChat ID: dcouwenb

Managing Editor

**Ms. Tara Dorrian**

Email: [tdorrian@nanophotonics-journal.com](mailto:tdorrian@nanophotonics-journal.com)

[Back to Contents](#)
